# Supplementary material for: Development of a Pressure Stable Inline Droplet Generator with Live Droplet Size Measurement
Source: Preprints.org preprint supplement (doi:10.20944/preprints202009.0259.v1), 2020-09-11
Supplement: Supplementary file 1 [file supplementary]

## SPRINGER NATURE LICENSE TERMS AND CONDITIONS

Jul 30, 2020

---

---

This Agreement between Karlsruhe Institute of Technology -- Heike Karbstein ("You") and Springer Nature ("Springer Nature") consists of your license details and the terms and conditions provided by Springer Nature and Copyright Clearance Center.

|                                                                                               |                                                                                                                                                       |
|-----------------------------------------------------------------------------------------------|-------------------------------------------------------------------------------------------------------------------------------------------------------|
| License Number                                                                                | 4878691139382                                                                                                                                         |
| License date                                                                                  | Jul 30, 2020                                                                                                                                          |
| Licensed Content Publisher                                                                    | Springer Nature                                                                                                                                       |
| Licensed Content Publication                                                                  | Microfluids and Nanofluids                                                                                                                            |
| Licensed Content Title                                                                        | Comparison of flow patterns and droplet deformations of modified sharp-edged and conical orifices during high-pressure homogenisation using $\mu$ PIV |
| Licensed Content Author                                                                       | Ariane Bisten et al                                                                                                                                   |
| Licensed Content Date                                                                         | May 14, 2018                                                                                                                                          |
| Type of Use                                                                                   | Journal/Magazine                                                                                                                                      |
| Requestor type                                                                                | academic/university or research institute                                                                                                             |
| Is this reuse sponsored by or associated with a pharmaceutical or a medical products company? | no                                                                                                                                                    |
| Format                                                                                        | electronic                                                                                                                                            |
